# Supplementary material for: Pimpinella anisum L. Essential Oil a Valuable Antibacterial and Antifungal Alternative
Source: MDPI journal article supplement (doi:10.3390/plants12132428), 2023-06-23

## Supplementary material

### Supplementary Figure S1.

GC-MS analysis - The peaks of the compounds from *Pimpinella anisum* essential oil

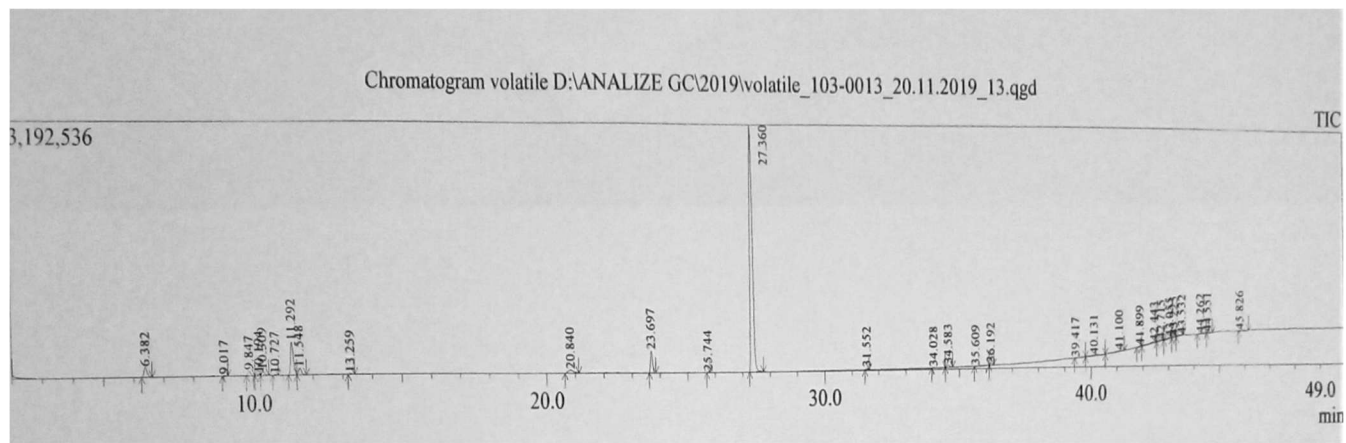

Supplement: s1 [file s1]
